# 1 Revealing the Physiological Origin of 2 Event-Related Potentials using 3 Electrocorticography in Humans

4 **Hohyun Cho**<sup>1,2,3</sup>, **Gerwin Schalk**<sup>1,4</sup>, **Markus Adamek**<sup>1,5</sup>, **Ladan Moheimanian**<sup>1,4</sup>,  
5 **William G. Coon**<sup>6</sup>, **Sung Chan Jun**<sup>7</sup>, **Jonathan R. Wolpaw**<sup>1,4</sup>, **Peter Brunner**<sup>1,2,3,8\*</sup>

\*For correspondence:

[brunner@neurotechcenter.org](mailto:brunner@neurotechcenter.org) (PB)

6 <sup>1</sup>National Center for Adaptive Neurotechnologies, Albany, NY 12208, USA; <sup>2</sup>Department  
7 of Neuroscience and Experimental Therapeutics, Albany Medical College, Albany, NY  
8 12208, USA; <sup>3</sup>Department of Neurosurgery, Washington University School of Medicine,  
9 St. Louis 63110, MO, USA; <sup>4</sup>Department of Biomedical Science, School of Public Health,  
10 State University of New York, Albany, NY 12222, USA; <sup>5</sup>Department of Neuroscience,  
11 Washington University School of Medicine, St. Louis 63110, MO, USA; <sup>6</sup>Applied Physics  
12 Laboratory, Johns Hopkins University, Baltimore, MD 21218, USA; <sup>7</sup>School of Electrical  
13 Engineering and Computer Science, Gwangju Institute of Science and Technology,  
14 Gwangju 61005, South Korea; <sup>8</sup>Department of Neurology, Albany Medical College,  
15 Albany 12208, NY, USA

16  
17 **Abstract** The scientific and clinical value of event-related potentials (ERPs) depends on  
18 understanding the contributions to them of three possible mechanisms: (1) additivity of  
19 time-locked voltage changes; (2) phase resetting of ongoing oscillations; (3) asymmetrical  
20 oscillatory activity. Their relative contributions are currently uncertain. This study uses analysis of  
21 human electrocorticographic activity to quantify the origins of movement-related potentials  
22 (MRPs) and auditory evoked potentials (AEPs). The results show that MRPs are generated  
23 primarily by endogenous additivity (88%). In contrast, P1 and N1 components of AEPs are  
24 generated almost entirely by exogenous phase reset (93%). Oscillatory asymmetry contributes  
25 very little. By clarifying ERP mechanisms, these results enable creation of ERP models; and they  
26 enhance the value of ERPs for understanding the genesis of normal and abnormal auditory or  
27 sensorimotor behaviors.

## 28 29 Introduction

30 The brain produces electrical responses to sensory, cognitive, and motor events. These responses,  
31 called event-related potentials (ERPs), can be detected by averaging the electrical activity recorded  
32 from electrodes placed on the scalp (electroencephalography (EEG)) (*Makeig et al., 2004*). ERPs  
33 have been used for decades to study different aspects of information processing in the brain (such  
34 as attention (*Coull, 1998*) or cognitive workload (*Isreal et al., 1980*)) or to diagnose specific neuro-  
35 logical disorders (such as deficits in the auditory or visual system (*Coats, 1978; Parisi et al., 2001*)).  
36 ERPs are characterized by the type of event that causes them, e.g., auditory stimulation (result-  
37 ing in auditory evoked potentials (AEPs)) or movements (resulting in movement-related potentials  
38 (MRPs)), and by the polarity (positive/negative) and latency (e.g., 100 ms) of the dominant peak in  
39 the response elicited by the event (*Picton et al., 1974*). Prior studies have hypothesized that three  
40 principal mechanisms give rise to ERPs (*Nikulin et al., 2007*): 1) additivity of event-related signal

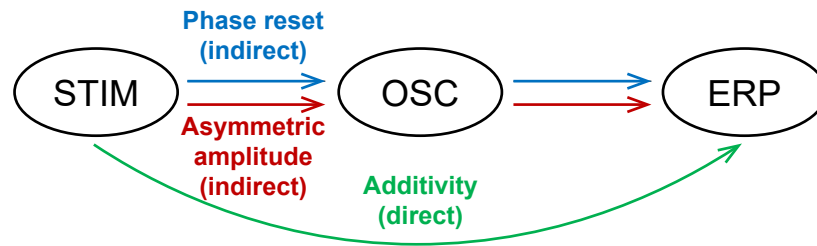

**Figure 1. Generating mechanisms of ERPs.** External stimuli (STIM) can give rise to ERPs directly through additivity, or indirectly through phase reset or asymmetric amplitude modulations of the ongoing oscillations (OSC).

**Figure 1–Figure supplement 1.** Additivity and phase reset mechanism

**Figure 1–Figure supplement 2.** Additivity and asymmetric amplitude mechanism

41 components (*Dawson, 1947; Shah et al., 2004; Mäkinen et al., 2005; Turi et al., 2012*); 2) phase re-  
42 set of underlying low-frequency (<40Hz) oscillatory activity (*Savers et al., 1974; Makeig et al., 2002;*  
43 *Hanslmayr et al., 2006*); and 3) asymmetry in oscillatory activity (*Nikulin et al., 2007; Mazaheri and*  
44 *Jensen, 2008; van Dijk et al., 2010; Schalk, 2015; Schalk et al., 2017*).

45 Together, these three mechanisms could account for much of the interactions between stimu-  
46 lus, neural oscillations, and ERPs. For the additivity mechanism, the stimulus may induce a direct  
47 response. For the phase reset mechanism, the stimulus may induce a phase reset in an ongoing  
48 oscillation. For the asymmetry mechanism, the stimulus may induce a variation in the biased oscil-  
49 lation (i.e., an oscillation with asymmetrically distributed peak/trough amplitudes). The differential  
50 effects of these three mechanisms produce an ERP. Consequently, while the additive mechanism  
51 directly affects the ERP, phase reset and asymmetry mechanisms indirectly affect the ERP through  
52 modulation of the ongoing oscillation (see *Figure 1, Figure 1–Figure Supplement 1, and Figure 1–*  
53 *Figure Supplement 2* for further details).

54 While these potential mechanisms have been described for decades (see *Appendix 1*), there  
55 is still considerable debate about them and their unique contributions, particularly in the con-  
56 text of auditory evoked potentials (AEPs) (*da Silva, 2006*) and movement-related potentials (MRPs)  
57 (*Sauseng et al., 2007*). The principal challenge is that scalp-recorded EEG reflects a mixture of differ-  
58 ent physiological phenomena that are produced by different areas of the brain, and decomposing  
59 EEG into its constituent components can produce different solutions (*Darvas et al., 2004*).

60 Moreover, determining the contribution of each of the three generating mechanisms to the gen-  
61 eration of ERPs depends on the ability to completely decompose the neural signal into its additive,  
62 phase reset, and asymmetry components. Prior work has attempted to perform this decomposi-  
63 tion only for additive contributions, and asymmetry in oscillation has only recently been proposed.  
64 In addition, investigating the role of phase reset in the generation of ERPs is difficult. It requires  
65 that three preconditions are fulfilled (*Sauseng et al., 2007*): 1) the frequency band of the ongoing  
66 oscillation needs to be defined; 2) the frequency band of the ongoing oscillation must match that  
67 of the ERP component; and 3) the physiological sources of the ERP component and the ongoing  
68 oscillation need to match. Fulfilling these three preconditions requires access to spatially uncon-  
69 founded signals, which are only affected by local neural activity.

70 These requirements effectively limit the investigation of the contribution of the three gener-  
71 ating mechanisms to signals recorded directly from the surface of the brain. To date, only one  
72 study has quantified the role of additivity in the generation of ERPs (*Turi et al., 2012*). In this study,  
73 Turi et al. investigated the generation of ERPs in monkeys using local field potentials and gener-  
74 alized their results to human subjects using MEG. However, this generalization depended on an  
75 independent component analysis (ICA), which assumes that the components of the signal are in-  
76 dependent (*Hyvärinen et al., 2001*). This assumption conflicts with the precondition of phase reset,  
77 i.e., that ERPs can only be generated in the presence of an ongoing oscillation. Further, this study

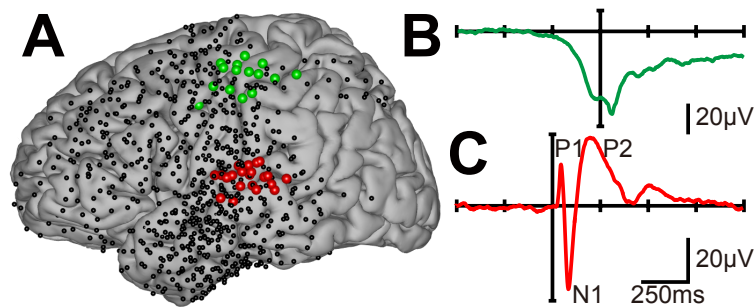

**Figure 2. Location and shape of cortical ERPs.** **A.** Electrode locations for all subjects (dots). Locations that exhibited task-related activity during auditory stimulation or motor movements are highlighted in red or green, respectively. **B.** The green trace shows the ERP produced by a button press, averaged across all task-related locations and subjects. **C.** The red trace shows the ERP produced by auditory stimulation, averaged across all task-related locations and subjects. These average ECoG ERPs are similar to ERPs reported in this or previous studies that used scalp-recorded EEG (*Figure 2-Figure Supplement 5*).

**Figure 2-Figure supplement 1.** Task-related locations for each ECoG subject.

**Figure 2-Figure supplement 2.** AEPs and MRPs for each ECoG subject.

**Figure 2-Figure supplement 3.** Grand average AEP and MRP across all EEG subjects.

**Figure 2-Figure supplement 4.** AEPs and MRPs from EEG for each EEG subject.

**Figure 2-Figure supplement 5.** ERPs comparisons with EEG literature.

78 only considered the variance in the ERP amplitude without considering the relationship between  
79 the ongoing oscillation and the resulting ERP. These issues render the conclusions of Hyvärinen's  
80 study to be less than certain.

81 Attempts to decompose EEG into its constituent components have resulted in uncertain (*Sauseng*  
82 *et al., 2007; Min et al., 2007; Fell et al., 2004*) or overtly conflicting (*Sauseng et al., 2007; Hanslmayr*  
83 *et al., 2006; Mazaheri and Jensen, 2006*) conclusions. This lack of clarity about the physiological  
84 origin of scalp-recorded evoked potentials greatly limits the detailed and accurate physiological in-  
85 terpretation of the results of thousands of studies using scalp-recorded ERPs, and the generation  
86 of more generalized models of brain function that such interpretation could inform.

87 In our study, we recorded signals from the surface of the brain to determine the physiological  
88 origin of auditory and movement-related potentials. We recorded electrocorticographic (ECoG)  
89 activity from eight human subjects while they executed a simple reaction-time task. In this task,  
90 the subjects responded to a salient auditory stimulus by pressing a push-button with the thumb  
91 contralateral to their ECoG implant. The subjects performed between 134 and 580 trials; their  
92 reaction time ( $277 \pm 110$  ms) was comparable to that of similar previous studies (*Molholm et al.,*  
93 *2002*); and they responded within 1 s of the stimulus onset in  $99.8 \pm 0.3\%$  of all trials.

94 First, we determined those electrode locations at which ECoG high gamma activity (70–170 Hz),  
95 a widely accepted index of population-level cortical activity (*Edwards et al., 2005; Darvas et al.,*  
96 *2010; Ray and Maunsell, 2011; Jenison et al., 2015; Schalk et al., 2017*), increased in response to  
97 the auditory stimulus or the button press. Across all subjects, this procedure resulted in 22 and  
98 15 task-related locations, respectively (*Figure 2A* and *Figure 2-Figure Supplement 1*). We then  
99 determined the grand average MRP (*Figure 2B*) and AEP (*Figure 2C*) and verified their consistency  
100 across individual subjects (*Figure 2-Figure Supplement 2*). We further compared our results to  
101 those obtained from EEG in control subjects that performed the same experiment (*Figure 2-Figure*  
102 *Supplement 3 & Figure 2-Figure Supplement 4*), and to those of similar experiments reported in  
103 the literature (*Figure 2-Figure Supplement 5*). To determine the specific contribution of each of the  
104 three possible generating mechanisms to the AEP and MRP responses, we assessed the fraction  
105 of the overall signal accounted for by each generating mechanism. Prior to this assessment, we  
106 verified that our data fulfilled the three preconditions for investigating phase reset (*Figure 3*). For  
107 this, we first determined that the frequency band of the ongoing oscillation across all eight subjects

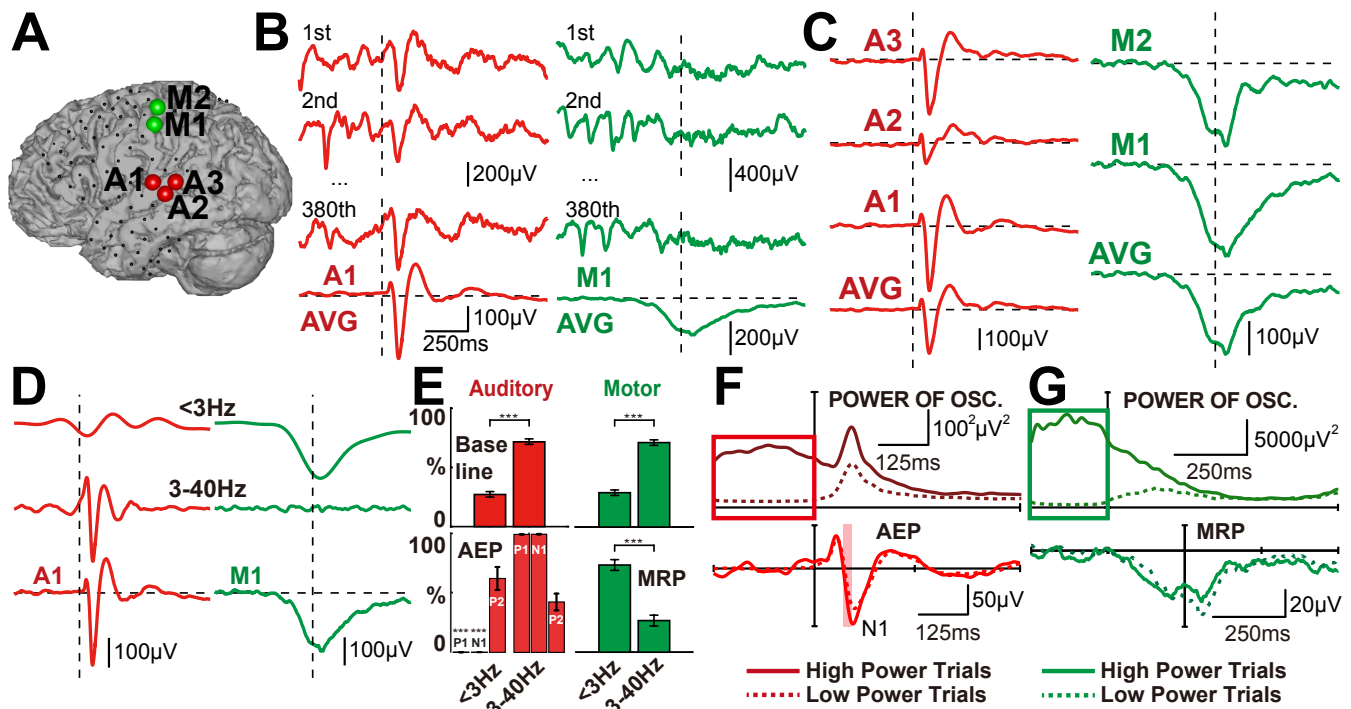

**Figure 3. Overview of ERP analyses and their results.** **A.** Locations exhibiting evoked potentials resulting from auditory stimulation (red dots) or a button press (green dots) in subject S3. **B.** Time course of ECoG activity during auditory stimulation (left) and button presses (right) for locations A1 and M1, and their across-trial average. Single-trial ECoG responses at location A1 are phase-locked at stimulus onset, and demonstrate the same N1, P1, and P2 components as seen in the across-trial average. In contrast, single-trial ECoG responses at location M1 are not phase-locked at movement onset, and thus no evoked potentials are exhibited in the average across all trials. Instead, a slow cortical potential arises from the average across all trials. **C.** Average AEPs (red traces on the left) and MRPs (green traces on the right) for locations A1-3 and M1-2 and their average in subject S3. All auditory locations exhibit a clear N1, P1, and P2 components, and all motor locations exhibit a prominent slow cortical potential. **D.** Time courses of ERPs from locations A1 and M1 in subject S3 in two different frequency bands (<3 Hz and 3-40 Hz). The characteristic components of the AEP are captured by the 3-40 Hz band. In contrast, the slow negative potential in the MRP can only be seen in the <3 Hz band. **E.** ECoG power in the <3 Hz and 3-40 Hz bands for baseline (-400 to 0 ms) and ERP (0 to 400 ms) periods (top and bottom, respectively), calculated across all task-related locations and all subjects. Baseline activity is mostly comprised of 3-40 Hz band power ( $p < 0.001$ , paired t-test). The P1 and N1 components of AEPs are comprised of 3-40 Hz band power ( $p < 0.001$ , paired t-test), while MRPs are mainly comprised of <3 Hz band power ( $p < 0.001$ , paired t-test). **F.** Power (top) and shape of AEPs (bottom) in the 3-40 Hz band for trials with the highest (solid) and lowest (dashed) 10th percentile of pre-stimulus power (calculated per task-related location, averaged across all locations and subjects). Higher pre-stimulus power results in higher N1 amplitudes in AEPs ( $p < 0.05$ , t-test, FDR corrected for  $N=22$ ). **G.** Power (top) and shape of MRPs (bottom). Pre-stimulus power does not markedly affect the shape of MRPs ( $p < 0.05$ , t-test, FDR corrected for  $N=15$ ).

**Figure 3-Figure supplement 1.** Determining the frequency band of the ongoing oscillation.

**Figure 3-Figure supplement 2.** Relationship between ongoing oscillatory power and reaction time.

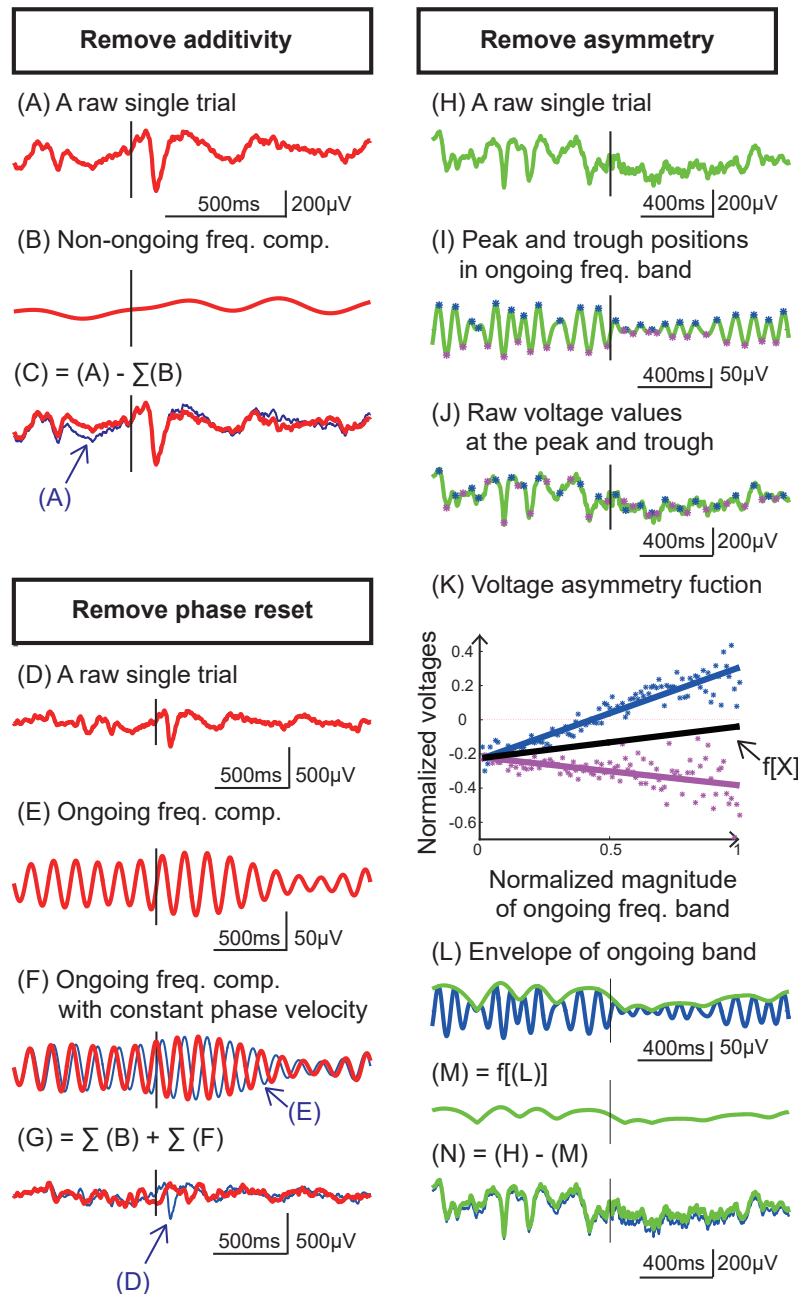

**Figure 4. Method to remove the effect of additivity, phase reset, and asymmetric amplitude from evoked potentials.** We first determined the frequency band of the ongoing oscillation (Figure 3–Figure Supplement 1). To remove the additive effect, we removed frequency components outside of the ongoing oscillation (see C). For this, we subtracted the frequency components outside the frequency band of the ongoing oscillation (see B) from the evoked potentials (see A). To remove the effect of phase reset, we recomposed the evoked potentials with constant phase velocity. For this, we decomposed each trial into 1 Hz-wide frequency bands between 1 and 200 Hz (see E). Next, we adjusted the signal's ongoing oscillation to have constant phase velocity (see F). Finally, we combined the time series across all frequency bands into our recomposed signal (see G). To remove the effect of asymmetric amplitude, we subtracted the asymmetric bias from each evoked potential within the frequency band of the ongoing oscillation. For this, we first detected the peak and troughs within the ongoing oscillation (see I). Next, we determined the relationship between the amplitude at these peaks and troughs in the ongoing oscillation, and the voltage at the same time points in the original signal (see J). This analysis yielded two linear relationships (i.e., voltage-to-voltage functions), one for the peak (see the blue line in K), and one for the trough (see the purple line in K). The average between these two relationships represents the asymmetry between peak and trough amplitude as a function of the amplitude of the ongoing oscillation (see black line in K). We used this function to translate the envelope of ongoing oscillation (see L) into the asymmetric bias (see M). Finally, we subtracted the time-varying asymmetric amplitude from each trial's original signal (see N).

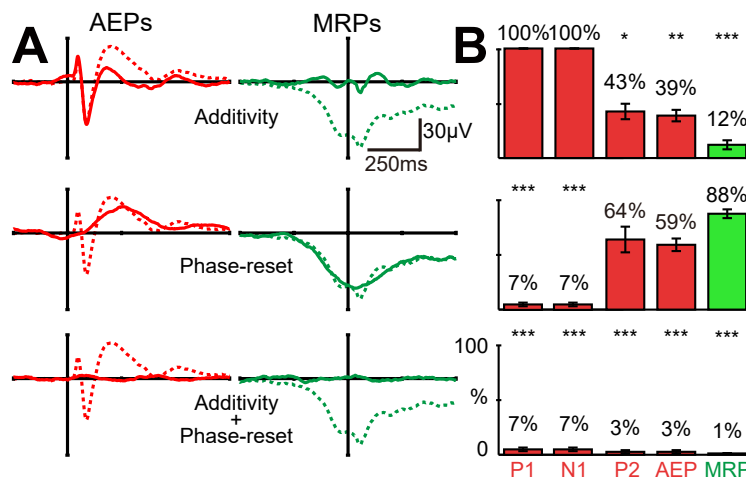

**Figure 5. Shape (A) and energy (B) of ERP components before (dashed lines) and after (solid lines) removing additive and phase reset contribution.** Additivity accounts for most of the P2 component's energy in the AEPs ( $p < 0.05$ , t-test) and almost the entire energy of the slow negative potential in the MRPs ( $p < 0.001$ , t-test). Phase reset accounts for almost all of the P1 and N1 components' energy in the AEPs ( $p < 0.001$ , t-test). Together, additivity and phase reset account for almost the entire energy of AEPs and MRPs and their components ( $p < 0.001$ , t-test).

**Figure 5-Figure supplement 1.** Effect of power variations and asymmetric amplitude.

**Figure 5-Figure supplement 2.** Asymmetric amplitude contribution to the energy of ERPs.

108 was within the 3–40 Hz band (**Figure 3-Figure Supplement 1**). Second, we verified that the N1 and  
 109 P1 components were within the same band of the ongoing oscillation (**Figure 3E**). We fulfilled the  
 110 third precondition by using ECoG signals for which the physiological sources of ERP components  
 111 and ongoing oscillations are identical.

## 112 Results

113 After verifying that all three preconditions for our phase reset analysis were fulfilled, we deter-  
 114 mined the contribution of each of the three generating mechanisms by removing their influence  
 115 from the individual trials. For the additivity mechanism, we removed frequency components out-  
 116 side of the ongoing oscillation. For the phase reset mechanism, we recomposed each trial's signal  
 117 within the frequency band of the ongoing oscillation with constant phase velocity (**Freeman, 2004**).  
 118 For the asymmetric amplitude mechanism, we subtracted the asymmetric bias from each trial's sig-  
 119 nal within the frequency band of the ongoing oscillation (**Nikulin et al., 2007; Mazaheri and Jensen,**  
 120 **2008; Schalk, 2015**). **Figure 4** illustrates this process for each of the three generating mechanisms.

121 In our analyses, we were interested in determining the spectral composition of the elicited AEPs  
 122 and MRPs, and in quantifying the contribution of each of the three generating mechanisms to the  
 123 ERP's total energy.

124 The results of our spectral composition analysis shows that MRPs are comprised mostly of low  
 125 frequency components ( $< 3$  Hz), while P1 and N1 of AEPs are comprised mainly of 3–40 Hz compo-  
 126 nents (**Figure 3E**). Further, we observed that higher pre-stimulus oscillation power yields a bigger  
 127 N1 peak amplitude in the AEP (**Figure 3F**), but doesn't influence the MRP amplitudes (**Figure 3G**).  
 128 The analysis of the specific contribution of each mechanism in the rise of the AEPs and MRPs shows  
 129 that the additivity mechanism explains 61% and 88% of the energy in the AEPs and MRPs, respec-  
 130 tively (**Figure 5B**). The phase reset mechanism explains 41% and 12% of the energy in the AEPs and  
 131 MRPs, respectively (**Figure 5B**). In contrast, the asymmetric amplitude effect only explains 6% of the  
 132 energy in the AEPs and MRPs (**Figure 5-Figure Supplement 1**). It should be noted that, due to the  
 133 finite precision of our computations involving the removal of the three generating mechanisms  
 134 from thousands of single trials, and rounding of the percentage numbers, reported aggregated

135 energy may exceed 100%.

136 Finally, we found that the combination of additivity and phase reset mechanisms explains al-  
137 most the entire amount of energy in the ERPs (97% and 99% of the energy in the AEPs and MRPs)  
138 (**Figure 5**). Our results show that the individual components of the AEPs (i.e., P1 and N1 compo-  
139 nents) are mostly generated by phase reset (93%). In contrast, the P2 component is generated by  
140 both additivity (57%) and phase reset (36%) (**Figure 5B**).

## 141 Discussion

142 In this study, we investigated the specific contributions of additivity, phase reset, and asymmetric  
143 amplitude to AEPs and MRPs. Our results demonstrate that MRPs are generated mainly through  
144 additivity (88%) with little contribution from phase reset (12%). Within the AEPs, the P1 and N1  
145 components are mostly generated by phase reset (93%) while the P2 component is generated  
146 by additivity (57%) and phase reset (36%). In contrast to recent speculations (**Schalk, 2015; Nikulin**  
147 **et al., 2007; Mazaheri and Jensen, 2008**), oscillatory voltage asymmetry only marginally contributes  
148 to these ERP components (6%).

## 149 Ongoing oscillation affects ERPs and behavior

150 Our results show that the power of the ongoing oscillation (expressed as the pre-stimulus power  
151 in the 3–40 Hz band) directly modulates the N1 amplitude in the AEP. In contrast, the amplitude of  
152 the MRP remains unaffected by the power of low-frequency oscillations (expressed by pre-stimulus  
153 power in the <3 Hz band). This is consistent with previous studies showing that ongoing oscillations  
154 affect the AEPs (**Rahn and Basar, 1993; Haig and Gordon, 1998**) and visual evoked potentials  
155 (**Makeig et al., 2002, 2004; Min et al., 2007**). As ongoing oscillations are a hallmark of cortical in-  
156 hibition, we were interested in determining whether the relationship between the amplitude of  
157 ongoing oscillations and the amplitude of the AEP's components also extended to the resulting be-  
158 havior (i.e., the reaction time to the auditory stimulus). In fact, our results show that higher power  
159 of ongoing oscillations not only increase the amplitude of the AEP's components, but also increase  
160 reaction time (see **Figure 3–Figure Supplement 2**). This confirms that ongoing oscillations directly  
161 affect behavior (**Klimesch et al., 2007; Haegens et al., 2011**).

## 162 Phase reset and ERPs

163 Our results also show that MRPs meet none of the preconditions for phase reset. First, we did not  
164 find any ongoing low-frequency oscillation (<3 Hz) within the 1000 ms-long pre-stimulus period  
165 (**Figure 3–Figure Supplement 1**). Second, the frequency characteristics of the pre-stimulus period  
166 and the MRP are different (**Figure 3E**). Third, oscillatory voltage asymmetry only marginally con-  
167 tributed to the generation of MRPs (**Figure 5–Figure Supplement 1**). Together with the results of  
168 our main analysis, this shows that MRPs are generated by additivity and not by phase reset (**Fig-  
169 ure 5**).

170 In contrast to MRPs, our results show that AEPs meet all preconditions for phase reset. This  
171 confirms previous studies (**Makeig et al., 2002; Rahn and Basar, 1993; Haig and Gordon, 1998;  
172 Hanslmayr et al., 2006; Mäkinen et al., 2005**) that showed that the ongoing oscillation directly  
173 affects the amplitude of the AEP's components (**Figure 3F**) and shares the same frequency charac-  
174 teristics (**Figure 3E**). Together with the results of our main analysis, this shows that the P1 and N1  
175 components of the AEP are generated by phase reset and not by additivity, while the P2 compo-  
176 nent is generated jointly by additivity and phase reset (**Figure 5**). The latter result may be due to  
177 the variance in amplitude and time of the P2 component across subjects and will require further  
178 investigation (**Figure 5–Figure Supplement 2**).

## 179 Asymmetry in oscillatory activity and ERPs

180 Interestingly, we did not find a significant contribution of oscillatory voltage asymmetry to the gen-  
181 eration of ERPs (**Figure 5–Figure Supplement 1**).

182 On average, our ERPs were correlated with the envelope of the ongoing oscillation (Pearson's  
183 correlation, AEPs:  $r^2=0.34\pm 0.26$ , MRPs:  $r^2=0.44\pm 0.23$ ), and 18/22 auditory locations and 13/15 mo-  
184 tor locations have significant correlations ( $p<0.01$ , bonferroni corrected). This correlation is consid-  
185 ered to be the governing factor of the contribution of asymmetric amplitude to the generation of  
186 ERPs (Nikulin et al., 2007; Mazaheri and Jensen, 2008; van Dijk et al., 2010). An analysis of individual  
187 cortical locations confirms this, showing that this correlation is indeed a strong governing factor of  
188 the contribution of oscillatory voltage asymmetry to the generation of ERPs (Pearson's correlation,  
189 AEPs:  $r=0.71$ ,  $p<0.01$ , MRPs:  $r=0.80$ ,  $p<0.01$ , as shown in **Figure 5–Figure Supplement 2A**).

190 However, the shape of ERPs and the envelope of ongoing oscillation were not completely same,  
191 although there were significant correlations (see **Figure 5–Figure Supplement 2B**). The mismatch  
192 of the ERP and the envelope of ongoing oscillation in terms of shape yields less reduction from  
193 asymmetry removal in single trials. Thus, our results confirm that oscillatory voltage asymmetry is  
194 not a prerequisite for the generation of evoked responses (Nikulin et al., 2010).

### 195 **Physiological interpretation**

196 In their seminal review of the change in the ongoing EEG/MEG in the form of event-related desyn-  
197 chronization (ERD) or event-related synchronization (ERS), Pfurtscheller and da Silva showed that  
198 stimulus-evoked and cortex-induced activity within the cortex differ in their physiological pathways.  
199 (Pfurtscheller and Da Silva, 1999)

200 Although we only investigated auditory and motor responses in the present study, our results,  
201 along with supporting evidence from the literature, further elucidate the role of these physiolog-  
202 ical pathways. Specifically, our results in **Figure 3F** and **Figure 5**, along with supporting literature,  
203 (Makeig et al., 2002; Rahn and Basar, 1993; Haig and Gordon, 1998; Hanslmayr et al., 2006; Mäki-  
204 nen et al., 2005) show that phase reset generates the P1 and N1 components within the ERPs. As  
205 P1 and N1 components are considered exogenous activity, (Pfurtscheller and Da Silva, 1999; Sur  
206 and Sinha, 2009) phase reset can also be considered to be exogenous, or stimulus-evoked. In con-  
207 trast, our results (see **Figure 3G** and **Figure 5**) show that additivity generates the MRP. As MRP are  
208 considered endogenous activity, (Pfurtscheller and Da Silva, 1999; Sur and Sinha, 2009; Neshige  
209 et al., 1988) additivity can also be considered endogenous (i.e., induced by cortical neurons in the  
210 absence of external stimuli). In conclusion, we infer that phase reset and additivity are involved in  
211 exogenous and endogenous activity, respectively.

### 212 **Relevance for neuronal dysfunction**

213 The N1 response to auditory stimuli is a well-known biomarker of schizophrenia (Ford et al., 1994,  
214 2001; Roth et al., 1980; Javitt and Sweet, 2015; Abeles and Gomez-Ramirez, 2014). Studies investi-  
215 gating this biomarker also found that human subjects affected by schizophrenia, when compared  
216 to healthy subjects, not only exhibit smaller auditory N1 amplitudes, but also smaller ongoing alpha  
217 oscillations (Abeles and Gomez-Ramirez, 2014). Further studies found that administering Ketamine  
218 (an NDMA receptor agonist that has shown to reduce alpha power during resting state and N1 am-  
219 plitudes (de Pestere et al., 2016; Javitt and Sweet, 2015)) to healthy human subjects resulted in  
220 schizophrenia like symptoms (Javitt, 2012; Javitt and Sweet, 2015). This suggests that alpha oscil-  
221 lations and N1 components share the same neural generator. Our results support this hypothesis  
222 by explaining how phase reset during smaller ongoing oscillations yields smaller N1 responses.

223 While our results showed that the reaction time increases with the amplitude of the ongoing os-  
224 cillation **Figure 3–Figure Supplement 2**, other studies showed that subjects affected by schizophre-  
225 nia exhibit increased reaction time despite a comparatively small ongoing alpha oscillation (Nuechter-  
226 lein, 1977; Kaiser et al., 2008). These contradictory results may be explained by preoccupation of  
227 cortical resources with processing auditory hallucinations. It is well-known that a reduction in the  
228 available cortical resources directly results in a smaller observable amplitude of the ongoing os-  
229 cillation (Hanslmayr et al., 2011; Pfurtscheller and Da Silva, 1999; de Pestere et al., 2016). This



230 new insight may lead to further studies that investigate the role of ongoing oscillations in people  
231 affected by schizophrenia.

232 MRP and beta power are well-known biomarkers of Parkinson's disease. Studies investigating  
233 these biomarkers have shown that subject affected by Parkinson's disease, when compared to  
234 healthy subjects, exhibit higher beta power (*De Hemptinne et al., 2015*) and less-steeply sloped  
235 MRPs (*Cunnington et al., 1997*). Our results expand on these studies by suggesting that less-steeply  
236 sloped MRPs are a result of reduced endogenous additive activity from motor cortex due to the  
237 inhibitory effect of beta oscillations originating from sub-cortical structures.

### 238 **Limitations and potential confounds**

239 While our experimental design controlled for many crucial confounds (i.e., through the use of pre-  
240 cise stimulus onset and randomization of the inter-stimulus interval), several factors remained  
241 outside of our control. First, behavioral confounds, such as distractions and variations in attention,  
242 are always a possibility. However, as we recorded up to 500 trials, it is unlikely that occasional  
243 distractions or lack of attention created a systematic confound. Second, due to experimental con-  
244 straints, we did not control for background noise. For that reason, we used a salient 1 kHz tone  
245 that exceeded the background noise level as our auditory stimulus. However, the saliency of the  
246 stimulus may have affected both the shape and generating mechanisms of the AEPs. Third, the  
247 subjects in this study were patients affected by epilepsy. Compared to healthy people, they may  
248 display pathological differences in responses. However, the etiology of epilepsy varied across all  
249 eight subjects, which makes a systematic confound from this source unlikely as well. Nevertheless,  
250 we took three measures to minimize this effect. First, we verified that the seizure onset zone was  
251 distant from the areas of interest. Second, we conducted the experiment when the patient was  
252 alert and had not had a seizure for at least one day. Third, we excluded cortical locations and trials  
253 that exhibited clear epileptogenic activity and verified that epileptogenic activity was not related  
254 to, or entrained by, our external auditory stimuli.

255 To rule out the possibility that variability in the power of the ongoing oscillation had a con-  
256 founding additive effect to the generation of ERPs, we performed a control analysis in which we  
257 removed this variability from our signals. The results of this control analysis show that power vari-  
258 ations in the ongoing oscillation can only explain 12% and 1% of the energy in the AEPs and MRPs,  
259 respectively (*Figure 5–Figure Supplement 1*).

260 To confirm that ERPs obtained from ECoG represented valid AEPs and MRPs, we performed  
261 a control experiment with 7 subjects in which we recorded EEG and eye-movement data. The  
262 satisfactory comparison between AEPs and MRPs obtained from ECoG and those obtained from  
263 EEG (*Figure 2–Figure Supplement 4*), as well as those described in the literature (*Figure 2–Figure  
264 Supplement 5*), allowed us to reject this potential confound. Finally, because pre-stimulus saccades  
265 are known to induce phase reset into cortical signals (*Ito et al., 2011*), we verified that the subjects  
266 maintained eye-gaze throughout the pre-stimulus period. We detected saccades from 1 s before  
267 to 1 s after stimulus onset. However, our analysis showed that only 13 of 2370 trials over 7 subjects  
268 (EEG data) exhibited saccades before stimulus onset, making this an unlikely confound.

### 269 **Future studies**

270 Our results shed new light on the contributions of the three mechanisms (additivity, phase reset,  
271 and asymmetry) in the generation of ERPs, using signals recorded from the STG and M1 motor  
272 cortex. However, the role of the thalamus deserves more attention in the investigation of the  
273 generating mechanisms of ERPs. While our study used electrocorticographic electrodes placed on  
274 the surface of the brain, future studies could complement this with stereo-EEG electrodes placed  
275 within defined structures of the thalamus (e.g., the medial geniculate nucleus (MGN)). In general,  
276 the gyrate structure of the human brain implies that we can only subsample the cortex, and that  
277 some cortical areas remain outside of the reach of electrocorticographic recordings. For example,  
278 while we are able to record from the belt and parabelt areas of auditory cortex, most of primary

279 auditory cortex remains inaccessible to electrocorticographic recordings. Recent progress in surgi-  
280 cal techniques (*Kajikawa et al., 2015; Jenison et al., 2015*) could overcome this limitation and allow  
281 us to extend our exploration into primary auditory regions, such as A1 primary auditory cortex.  
282 Added to our current findings, these future studies could greatly improve our understanding of  
283 the cortical and subcortical pathways involved in the generation of AEPs and MRPs (*Orrison, 2008;*  
284 *Crosson, 1992; Paradiso et al., 2004*).

## 285 Conclusions

286 In summary, our results shed light on the previously unknown physiological origins of additivity,  
287 phase reset, and asymmetric amplitude mechanisms and their contribution to the generation of  
288 AEPs and MRPs. This new insight should facilitate the physiological interpretation of AEPs and  
289 MRPs. It should also guide the future creation of general models of evoked potentials and their  
290 relationship to behavior.

## 291 Methods and Materials

### 292 Subjects

293 Eight human subjects (S1–S8, 4 males, 4 females, average age =  $41 \pm 14$ ) participated in this study at  
294 the Albany Medical Center in Albany, New York. The subjects were mentally and physically capable  
295 of participating in our study (average IQ =  $96 \pm 18$ , range 75–120, *Wechsler 1997*). All subjects were  
296 patients with intractable epilepsy who underwent temporary placement of subdural electrode ar-  
297 rays to localize seizure foci prior to surgical resection.

298 The implanted electrode grids were approved for human use (Ad-Tech Medical Corp., Racine,  
299 WI; and PMT Corp., Chanhassen, MN). The platinum-iridium electrodes were 4 mm in diameter (2.3  
300 mm exposed), spaced 10 mm center-to-center, and embedded in silicone. The electrode grids were  
301 implanted in the left hemisphere for seven subjects (S1, S3, S6, and S7) and the right hemisphere  
302 for five subjects (S2, S4, S5 and S8). Following the placement of the subdural grids, each subject  
303 had postoperative anterior-posterior and lateral radiographs, as well as computer tomography (CT)  
304 scans, to verify grid location. These CT images, in conjunction with magnetic resonance imaging  
305 (MRI), were used to construct three-dimensional subject-specific cortical models and derive the  
306 electrode locations (*Coon et al., 2016*).

307 Patients with ECoG coverage extending from auditory to motor cortex are a relatively rare oc-  
308 currence. Thus, most previous ECoG studies were limited to subjects with either motor or au-  
309 ditory coverage and typically reported results from less than 8 participants (*Jenison et al., 2015;*  
310 *Edwards et al., 2005; Paradiso et al., 2004; Neshige et al., 1988*). In our study, we recorded elec-  
311 trocorticographic signals from auditory and motor cortex in 8 human subjects (*Figure 2-Figure*  
312 *Supplement 1*).

313 A further seven human subjects (X1–X7, all males, average age =  $27 \pm 3.6$ ) served as a control  
314 group for which we recorded EEG and eye-movement data. These subjects were fitted with an  
315 elastic cap (Electro-cap International, *Blom and Anneveldt 1982*) with tin (*Polich and Lawson, 1985*)  
316 scalp electrodes in 64 positions according to the modified 10-20 system (*Sharbrough, 1991*).

317 All subjects provided informed consent for participating in the study, which was approved by  
318 the Institutional Review Board of Albany Medical College and the Human Research Protections  
319 Office of the U.S. Army Medical Research and Materiel Command.

### 320 Data collection

321 We recorded ECoG signals from the subjects at their bedside using the general purpose Brain-  
322 Computer Interface (BCI2000) software (*Schalk et al., 2004*), interfaced with eight 16-channel g.USBamp  
323 biosignal acquisition devices, or one 256-channel g.Hlamp biosignal acquisition device (g.tec., Graz,  
324 Austria) to amplify, digitize (sampling rate 1,200 Hz) and store the signals. To ensure safe clinical

325 monitoring during the experimental tasks, a connector split the cables connected to the patients  
326 into a subset connected to the clinical monitoring system and a subset connected to the amplifiers.

327 We recorded EEG signals and eye-movement coordinates from the subjects in our control group  
328 using the same g.USBamp setup and a Tobii T60 eye-tracking monitor (Tobii Tech., Stockholm,  
329 Sweden) that was positioned at eye level 55–60 cm in front of the subject and was calibrated for  
330 each subject at the start of each experimental session.

### 331 **Task**

332 The subjects performed an auditory reaction task in which they responded with a button press to  
333 a salient 1 kHz tone. For this, the subjects used their thumb contralateral to their ECoG implant. In  
334 total, the subjects performed between 134 and 580 trials. Throughout each trial, the subjects were  
335 first required to fixate gaze onto the screen in front of them. Next, a visual cue indicated the start  
336 of the trial, which was followed by a random 1–3 s pre-stimulus interval and subsequently, the au-  
337 ditory stimulus. The stimulus was terminated by the subject's button press, or after a 2 s time out,  
338 after which the subject received feedback about his/her reaction time. This feedback motivated  
339 the subjects to respond as fast as possible to the stimulus. To prevent false starts, we penalized  
340 subjects with a warning tone if they responded too fast (i.e., less than 100 ms after stimulus onset).  
341 We excluded false-start trials from our analysis. In this study, we were interested in the auditory  
342 and motor response to this task. This required defining the onset of these two responses. For the  
343 auditory response, we defined this as the onset of the auditory stimulus (as measured by the volt-  
344 age between the sound port on the PC and the loudspeaker). For the motor response, we defined  
345 the onset as the time when the push-button was pressed. To ensure the temporal accuracy of  
346 these two onset markers, we sampled them simultaneously with the ECoG signals using dedicated  
347 inputs in our biosignal acquisition system. We defined baseline and task periods for the auditory  
348 and motor response. Specifically, we used the 0.5-s period prior to the stimulus onset as the base-  
349 line for the auditory response, and the 1-s to 0.5-s period prior to the button press as the baseline  
350 for the motor response. Similarly, we used the 1-s period after stimulus onset as the task period  
351 for the auditory response, and the period from 0.5-s before to 0.5-s after the button press as the  
352 task period for the motor task.

### 353 **Data pre-processing**

354 As our amplifiers acquired raw unfiltered ECoG signals, we first removed any offset from our sig-  
355 nals using 2nd order Butterworth highpass filter at 0.05 Hz. Next, we removed any common noise,  
356 using a common median reference filter. For the creation of the common-mode reference, we ex-  
357 cluded signals that exhibited an excessive 60 Hz line noise level (i.e., ten times the median absolute  
358 deviation). To improve the signal-to-noise ratio of our recordings and to reduce the computational  
359 complexity of our subsequent analysis, we downsampled our signals from 1200 to 400 Hz using  
360 MATLABs "resample" function, which uses a polyphase antialiasing filter to resample the signal at  
361 the uniform sample rate.

### 362 **Electrode selection**

363 To select the appropriate electrodes, we needed to determine which electrodes exhibited an early  
364 auditory or motor-related response. We accomplished this in three steps. In the first step, we  
365 selected only those cortical locations that exhibited a task-related response in the high gamma  
366 band. For this purpose, we performed a statistical comparison between baseline and task peri-  
367 ods across all trials. Specifically, we calculated the Spearman's correlation coefficient between the  
368 power of baseline/task periods, and a corresponding label (i.e., -1 for baseline and +1 for task pe-  
369 riod). This yielded one correlation value for each of our cortical locations. Next, we performed a  
370 permutation test to determine the significance of each cortical location's correlation value. In this,  
371 we calculated our correlation coefficient 1000 times, each time with a newly permuted sequence  
372 of labels. This yielded a distribution of correlation values with an area under the curve (AUC) of 1.

373 Next, we determined the significance of our true correlation value as the single-tailed AUC created  
374 by the intersection of the true correlation value with the distribution of correlation values obtained  
375 from the permutation test. Finally, we identified the cortical locations exhibiting a task-related re-  
376 sponse in the high gamma band that had a p-value smaller than 0.001 (Bonferroni-corrected for  
377 the number of cortical locations). In the second step, for each subject, we restricted our selection  
378 to the single auditory and single motor-related cortical locations that exhibited the earliest onset.  
379 To perform this selection, we first calculated the Spearman's correlation coefficient between the  
380 power of baseline/task periods for individual time points of the task period (i.e., auditory: 500 ms  
381 after stimulus onset for auditory; motor: 250 ms before button press). Next, we determined the  
382 onset of task-related cortical activity as the earliest time point when the correlation exceeded the  
383 99th percentile of all correlation values. This defined one auditory-related and one motor-related  
384 location exhibiting the earliest cortical onset. Finally, in the third step, we expanded our selection  
385 to include those cortical locations, identified in the first step, that were within 15 mm of our earliest  
386 onset locations.

### 387 **Removing effects of phase reset**

388 Phase reset is reflected as spikes in the phase velocity, i.e., the first derivative of the phase signal  
389 (*Freeman et al., 2003, 2006; Thatcher, 2012*). To remove the effect of phase reset, we recomposed  
390 each trial's original signal with constant phase velocity (see *Figure 4*). To accomplish this, we first  
391 decomposed each trial's signal into 1 Hz wide frequency bands between 1 and 200 Hz. For this,  
392 we first applied a fast Fourier transform (FFT) on each trial's signal to calculate the discrete Fourier  
393 transform (DFT) of our signals. This decomposition yielded the frequency representation of our  
394 signal. We then used the inverse FFT to recreate individual time series for each 1 Hz wide fre-  
395 quency band. Next, we determined the constant velocity that each frequency band's time series  
396 should have as its phase velocity during the baseline period (calculated as a first derivative of the  
397 phase of the Hilbert transform, as shown in *Figure 4E*). Next, for frequency bands above 3 Hz, we  
398 recomposed the time series with constant phase velocity. For this, we applied the envelope from  
399 the original time series onto a cosine signal with the constant phase velocity determined in the  
400 previous step. Finally, we applied an inverse FFT on each frequency band to recompose the signal.  
401 This recomposition yielded a time series with constant phase and the same power as the original  
402 time series. Finally, we combined the time series across all frequency bands into our recomposed  
403 signal.

### 404 **Removing effects of asymmetric amplitude**

405 Asymmetric amplitude is characterized by an asymmetry between the peak and trough amplitudes  
406 of ongoing oscillations. This asymmetry varies over time and can affect the shape of low-frequency  
407 components within the ERP (*Mazaheri and Jensen, 2008*). To remove this effect, we estimated and  
408 removed the time-varying asymmetric amplitude from each trial's original signal (see *Figure 4H-N*).  
409 As the asymmetry between peak and trough amplitude is a function of the peak and trough ampli-  
410 tudes themselves (*Mazaheri and Jensen, 2008*), we first needed to determine this function for each  
411 cortical location. For this purpose, we first detected the peak and troughs in the ongoing oscillation  
412 (i.e., the 3–40 Hz filtered signal). Next, we identified the relationship between the amplitude  
413 at these peaks and troughs in the ongoing oscillation and the voltage at the same time points in  
414 the original signal. This analysis yielded two linear relationships (i.e., voltage-to-voltage functions),  
415 one for the peak, and one for the trough. The average between these two relationships represents  
416 the asymmetry between peak and trough amplitude as a function of the amplitude of the ongoing  
417 oscillation. We use this function to determine and subtract the time-varying asymmetric amplitude  
418 from each trial's original signal.

## 419 **Removing effect of variability in signal power**

420 Variability in the power of the ongoing oscillation can affect the shape of the resulting ERP (*Makeig*  
421 *et al., 2002; Min et al., 2007*). To account for this potentially confounding effect, we removed this  
422 variability from our signals. To accomplish this, we recomposed each trial's original signal with con-  
423 stant power, as described in the previous section on removing the effects of phase reset. However,  
424 for this recomposition, we applied constant amplitude instead of constant phase. We determined  
425 the constant amplitude that each frequency band's time series should have, as its median ampli-  
426 tude during the baseline period. This recomposition yielded a time series with constant amplitude  
427 and the same phase as the original time series. We combined the time series across all frequency  
428 bands into our recomposed signal.

## 429 **Data and Code Availability**

430 The dataset and code accompanying this manuscript have been deposited in an online repository  
431 (<https://doi.org/10.5281/zenodo.4361654>). Access will be granted by the Corresponding Author upon  
432 reasonable request, or without restrictions after the publication of this manuscript.

## 433 **Acknowledgments**

434 The authors thank Drs. Scott Makeig and Ole Jensen for their invaluable feedback. This work was  
435 supported by the NIH/NIBIB (P41-EB018783, R01-EB026439), the NIH/NINDS (U01-NS108916 and  
436 U24-NS109103), the NIH/NIMH (P50-MH109429), the US Army Research Office (W911NF-07-1-0415,  
437 W911NF-08-1-0216 and W911NF-14-1-0440), Fondazione Neurone, and the Institute of Information  
438 & Communications Technology Planning & Evaluation (IITP) grant funded by the Korea government  
439 (No. 2017-0-00451).

## 440 **Competing Interests**

441 The authors declare that they have no competing interests.

## 442 **Author contributions**

443 Conceptualization: H.C., G.S. and P.B.; Methodology: H.C., G.S., L.M., S.C.J. and P.B.; Software: M.A.,  
444 W.G.C. and P.B.; Validation: P.B.; Formal Analysis: H.C.; Investigation: H.C., M.A., L.M., W.G.C. and  
445 P.B.; Resources: P.B.; Data Curation: P.B.; Writing-Original Draft: P.B.; Writing-Review and Editing:  
446 H.C., M.A., J.R.W. and P.B.; Visualization: H.C. and M.A.; Supervision: G.S., S.C.J. and P.B.; Project  
447 Administration: G.S., J.R.W. and P.B.; Funding Acquisition: G.S., S.C.J., J.R.W. and P.B.;

## 448 **References**

- 449 **Abeles IY**, Gomez-Ramirez M. Impairments in background and event-related alpha-band  
450 oscillatory activity in patients with schizophrenia. *PLoS One*. 2014; 9(3):e91720. doi:  
451 <https://doi.org/10.1371/journal.pone.0091720>.
- 452 **Blom J**, Anneveldt M. An electrode cap tested. *Electroencephalogr Clin Neurophysiol*. 1982; 54(5):591-594. doi:  
453 [https://doi.org/10.1016/0013-4694\(82\)90046-3](https://doi.org/10.1016/0013-4694(82)90046-3).
- 454 **Buzsáki G**, Logothetis N, Singer W. Scaling brain size, keeping timing: evolutionary preservation of brain  
455 rhythms. *Neuron*. 2013; 80(3):751-764. doi: <https://doi.org/10.1016/j.neuron.2013.10.002>.
- 456 **Coats AC**. Human auditory nerve action potentials and brain stem evoked responses: Latency-intensity func-  
457 tions in detection of cochlear and retrocochlear abnormality. *Arch of Otolaryngol*. 1978; 104(12):709-717.
- 458 **Coon WG**, Gunduz A, Brunner P, Ritaccio AL, Pesaran B, Schalk G. Oscillatory phase modulates  
459 the timing of neuronal activations and resulting behavior. *NeuroImage*. 2016; 133:294-301. doi:  
460 <https://doi.org/10.1016/j.neuroimage.2016.02.080>.
- 461 **Coull JT**. Neural correlates of attention and arousal: insights from electrophysiology, functional neuroimag-  
462 ing and psychopharmacology. *Prog Neurobiol*. 1998; 55(4):343-361. doi: [https://doi.org/10.1016/s0301-0082\(98\)00011-2](https://doi.org/10.1016/s0301-0082(98)00011-2).

- 464 **Crosson BA.** Subcortical functions in language and memory. Guilford Press; 1992.
- 465 **Cunnington R,** Iansek R, Johnson KA, Bradshaw JL. Movement-related potentials in Parkinson's  
466 disease. Motor imagery and movement preparation. *Brain.* 1997; 120(8):1339-1353. doi:  
467 <https://doi.org/10.1093/brain/120.8.1339>.
- 468 **Dang-Vu TT,** Schabus M, Desseilles M, Albouy G, Boly M, Darsaud A, Gais S, Rauchs G, Sterpenich V, Vande-  
469 walle G, et al. Spontaneous neural activity during human slow wave sleep. *Proc Natl Acad Sci USA.* 2008;  
470 105(39):15160-15165. doi: <https://doi.org/10.1073/pnas.0801819105>.
- 471 **Darvas F,** Pantazis D, Kucukaltun-Yildirim E, Leahy R. Mapping human brain function  
472 with MEG and EEG: methods and validation. *NeuroImage.* 2004; 23:S289-S299. doi:  
473 <https://doi.org/10.1016/j.neuroimage.2004.07.014>.
- 474 **Darvas F,** Scherer R, Ojemann JG, Rao R, Miller KJ, Sorensen LB. High gamma mapping using EEG. *NeuroImage.*  
475 2010; 49(1):930-938. doi: <https://doi.org/10.1016/j.neuroimage.2009.08.041>.
- 476 **Dawson G.** Cerebral responses to electrical stimulation of peripheral nerve in man. *J Neurol Neurosurg Psy-*  
477 *chiatry.* 1947; 10(3):134. doi: <https://doi.org/10.1136/jnnp.10.3.134>.
- 478 **De Gennaro L,** Ferrara M, Bertini M. The spontaneous K-complex during stage 2 sleep: is it the 'forerunner' of  
479 delta waves? *Neurosci Lett.* 2000; 291(1):41-43. doi: [https://doi.org/10.1016/s0304-3940\(00\)01366-5](https://doi.org/10.1016/s0304-3940(00)01366-5).
- 480 **De Hemptinne C,** Swann NC, Ostrem JL, Ryapolova-Webb ES, San Luciano M, Galifianakis NB, Starr PA. Ther-  
481 apeutic deep brain stimulation reduces cortical phase-amplitude coupling in Parkinson's disease. *Nat Neu-*  
482 *rosci.* 2015; 18(5):779-786. doi: <https://doi.org/10.1038/nn.3997>.
- 483 **van Dijk H,** van der Werf J, Mazaheri A, Medendorp WP, Jensen O. Modulations in oscillatory activity with  
484 amplitude asymmetry can produce cognitively relevant event-related responses. *Proc Natl Acad Sci USA.*  
485 2010; 107(2):900-905. doi: <https://doi.org/10.1073/pnas.0908821107>.
- 486 **Donoghue T,** Haller M, Peterson EJ, Varma P, Sebastian P, Gao R, Noto T, Lara AH, Wallis JD, Knight RT,  
487 et al. Parameterizing neural power spectra into periodic and aperiodic components. *Nat Neurosci.* 2020;  
488 23(12):1655-1665. doi: <https://doi.org/10.1038/s41593-020-00744-x>.
- 489 **Edwards E,** Soltani M, Deouell LY, Berger MS, Knight RT. High gamma activity in response to deviant  
490 auditory stimuli recorded directly from human cortex. *J Neurophysiol.* 2005; 94(6):4269-4280. doi:  
491 <https://doi.org/10.1152/jn.00324.2005>.
- 492 **Fell J,** Dietl T, Grunwald T, Kurthen M, Klaver P, Trautner P, Schaller C, Elger CE, Fernández G. Neu-  
493 ral bases of cognitive ERPs: more than phase reset. *J Cogn Neurosci.* 2004; 16(9):1595-1604. doi:  
494 <https://doi.org/10.1162/0898929042568514>.
- 495 **Ford JM,** Mathalon DH, Heinks T, Kalba S, Faustman WO, Roth WT. Neurophysiological evidence of  
496 corollary discharge dysfunction in schizophrenia. *Am J Psychiatry.* 2001; 158(12):2069-2071. doi:  
497 <https://doi.org/10.1176/appi.ajp.158.12.2069>.
- 498 **Ford JM,** White PM, Csernansky JG, Faustman WO, Roth WT, Pfefferbaum A. ERPs in schizophrenia: ef-  
499 fects of antipsychotic medication. *Biol Psychiatry.* 1994; 36(3):153-170. doi: [https://doi.org/10.1016/0006-](https://doi.org/10.1016/0006-3223(94)91221-1)  
500 [3223\(94\)91221-1](https://doi.org/10.1016/0006-3223(94)91221-1).
- 501 **Freeman WJ.** Origin, structure, and role of background EEG activity. Part 2. Analytic phase. *Clin Neurophysiol.*  
502 2004; 115(9):2089-2107. doi: <https://doi.org/10.1016/j.clinph.2004.02.028>.
- 503 **Freeman WJ,** Burke BC, Holmes MD. Aperiodic phase re-setting in scalp EEG of beta-gamma os-  
504 cillations by state transitions at alpha-theta rates. *Hum Brain Mapp.* 2003; 19(4):248-272. doi:  
505 <https://doi.org/10.1002/hbm.10120>.
- 506 **Freeman WJ,** Holmes MD, West GA, Vanhatalo S. Fine spatiotemporal structure of phase in human intracranial  
507 EEG. *Clin Neurophysiol.* 2006; 117(6):1228-1243. doi: <https://doi.org/10.1016/j.clinph.2006.03.012>.
- 508 **Haegens S,** Händel BF, Jensen O. Top-down controlled alpha band activity in somatosensory areas de-  
509 termines behavioral performance in a discrimination task. *J Neurosci.* 2011; 31(14):5197-5204. doi:  
510 <https://doi.org/10.1523/JNEUROSCI.5199-10.2011>.
- 511 **Haig AR,** Gordon E. Prestimulus EEG alpha phase synchronicity influences N100 amplitude and reaction time.  
512 *Psychophysiology.* 1998; 35(5):591-595. doi: <https://doi.org/10.1017/s0048577298970512>.

- 513 **Hanslmayr S**, Gross J, Klimesch W, Shapiro KL. The role of alpha oscillations in temporal attention. *Brain Res.*  
514 2011; 67(1-2):331–343. doi: <https://doi.org/10.1016/j.brainresrev.2011.04.002>.
- 515 **Hanslmayr S**, Klimesch W, Sauseng P, Gruber W, Doppelmayr M, Freunberger R, Pecherstorfer T, Birbaumer  
516 N. Alpha phase reset contributes to the generation of ERPs. *Cereb Cortex.* 2006; 17(1):1–8. doi:  
517 <https://doi.org/10.1093/cercor/bhj129>.
- 518 **Hyvärinen A**, Karhunen J, Oja E. Independent Component Analysis. John Wiley & Sons; 2001. doi:  
519 <https://doi.org/10.1002/0471221317>.
- 520 **Isreal JB**, Wickens CD, Chesney GL, Donchin E. The event-related brain potential as  
521 an index of display-monitoring workload. *Hum Factors.* 1980; 22(2):211–224. doi:  
522 <https://doi.org/10.1177/001872088002200210>.
- 523 **Ito J**, Maldonado P, Singer W, Grün S. Saccade-related modulations of neuronal excitability support synchrony  
524 of visually elicited spikes. *Cereb Cortex.* 2011; 21(11):2482–2497. doi: <https://doi.org/10.1093/cercor/bhr020>.
- 525 **Javitt DC**. Twenty-five years of glutamate in schizophrenia: are we there yet? *Schizophr Bull.* 2012; 38(5):911–  
526 913. doi: <https://doi.org/10.1093/schbul/sbs100>.
- 527 **Javitt DC**, Sweet RA. Auditory dysfunction in schizophrenia: integrating clinical and basic features. *Nat Rev*  
528 *Neurosci.* 2015; 16(9):535–550. doi: <https://doi.org/10.1038/nrn4002>.
- 529 **Jenison RL**, Reale RA, Armstrong AL, Oya H, Kawasaki H, Howard III MA. Sparse spectro-temporal recep-  
530 tive fields based on multi-unit and high-gamma responses in human auditory cortex. *PLoS One.* 2015;  
531 10(9):e0137915. doi: <https://doi.org/10.1371/journal.pone.0137915>.
- 532 **Kaiser S**, Roth A, Rentrop M, Friederich HC, Bender S, Weisbrod M. Intra-individual reaction time variabil-  
533 ity in schizophrenia, depression and borderline personality disorder. *Brain Cogn.* 2008; 66(1):73–82. doi:  
534 <https://doi.org/10.1016/j.bandc.2007.05.007>.
- 535 **Kajikawa Y**, Frey S, Ross D, Falchier A, Hackett TA, Schroeder CE. Auditory properties in the parabelt regions of  
536 the superior temporal gyrus in the awake macaque monkey: an initial survey. *J Neurosci.* 2015; 35(10):4140–  
537 4150. doi: <https://doi.org/10.1523/JNEUROSCI.3556-14.2015>.
- 538 **Klimesch W**, Sauseng P, Hanslmayr S. EEG alpha oscillations: the inhibition–timing hypothesis. *Brain Res Rev.*  
539 2007; 53(1):63–88. doi: <https://doi.org/10.1016/j.brainresrev.2006.06.003>.
- 540 **Leocani L**, Toro C, Zhuang P, Gerloff C, Hallett M. Event-related desynchronization in reaction time paradigms: a  
541 comparison with event-related potentials and corticospinal excitability. *J Clin Neurophysiol.* 2001; 112(5):923–  
542 930. doi: [https://doi.org/10.1016/s1388-2457\(01\)00530-2](https://doi.org/10.1016/s1388-2457(01)00530-2).
- 543 **Linden DE**, Prvulovic D, Formisano E, Völlinger M, Zanella FE, Goebel R, Dierks T. The functional neuroanatomy  
544 of target detection: an fMRI study of visual and auditory oddball tasks. *Cereb Cortex.* 1999; 9(8):815–823.  
545 doi: <https://doi.org/10.1093/cercor/9.8.815>.
- 546 **Makeig S**, Debener S, Onton J, Delorme A. Mining event-related brain dynamics. *Trends Cogn Sci.* 2004;  
547 8(5):204–210. doi: <https://doi.org/10.1016/j.tics.2004.03.008>.
- 548 **Makeig S**, Westerfield M, Jung TP, Enghoff S, Townsend J, Courchesne E, Sejnowski TJ. Dynamic brain sources of  
549 visual evoked responses. *Science.* 2002; 295(5555):690–694. doi: <https://doi.org/10.1126/science.1066168>.
- 550 **Mäkinen V**, Tiitinen H, May P. Auditory event-related responses are generated independently of ongoing brain  
551 activity. *NeuroImage.* 2005; 24(4):961–968. doi: <https://doi.org/10.1016/j.neuroimage.2004.10.020>.
- 552 **Mazaheri A**, Jensen O. Posterior  $\alpha$  activity is not phase-reset by visual stimuli. *Proc Natl Acad Sci USA.* 2006;  
553 103(8):2948–2952. doi: <https://doi.org/10.1073/pnas.0505785103>.
- 554 **Mazaheri A**, Jensen O. Asymmetric amplitude modulations of brain oscillations generate slow evoked re-  
555 sponses. *J Neurosci.* 2008; 28(31):7781–7787. doi: <https://doi.org/10.1523/JNEUROSCI.1631-08.2008>.
- 556 **Min BK**, Busch NA, Debener S, Kranczioch C, Hanslmayr S, Engel AK, Herrmann CS. The best of both worlds:  
557 phase-reset of human EEG alpha activity and additive power contribute to ERP generation. *Int J Psychophysiol.*  
558 2007; 65(1):58–68. doi: <https://doi.org/10.1016/j.ijpsycho.2007.03.002>.
- 559 **Molholm S**, Ritter W, Murray MM, Javitt DC, Schroeder CE, Foxe JJ. Multisensory auditory–visual interactions  
560 during early sensory processing in humans: a high-density electrical mapping study. *Cogn Brain Res.* 2002;  
561 14(1):115–128. doi: [https://doi.org/10.1016/s0926-6410\(02\)00066-6](https://doi.org/10.1016/s0926-6410(02)00066-6).

- 562 **Neshige R**, Lüders H, Shibasaki H. Recording of movement-related potentials from scalp and cortex in man.  
563 *Brain*. 1988; 111(3):719–736.
- 564 **Nikulin VV**, Linkenkaer-Hansen K, Nolte G, Curio G. Non-zero mean and asymmetry of neuronal oscillations have different implications for evoked responses. *Clin Neurophysiol*. 2010; 121(2):186–193. doi: <https://doi.org/10.1016/j.clinph.2009.09.028>.
- 567 **Nikulin VV**, Linkenkaer-Hansen K, Nolte G, Lemm S, Müller KR, Ilmoniemi RJ, Curio G. A novel mechanism for evoked responses in the human brain. *Eur J Neurosci*. 2007; 25(10):3146–3154. doi: <https://doi.org/10.1111/j.1460-9568.2007.05553.x>.
- 570 **Nuechterlein KH**. Reaction time and attention in schizophrenia: a critical evaluation of the data and theories. *Schizophr Bull*. 1977; 3(3):373. doi: <https://doi.org/10.1093/schbul/3.3.373>.
- 572 **Nunez P**, Srinivasan R. *Electric Fields of the Brain: The Neurophysics of EEG*. New York, NY: Oxford University Press; 1981.
- 574 **Orrison WW**. *Atlas of brain function*. Thieme; 2008.
- 575 **Paradiso G**, Cunic D, Saint-Cyr JA, Hoque T, Lozano AM, Lang AE, Chen R. Involvement of human thalamus in the preparation of self-paced movement. *Brain*. 2004; 127(12):2717–2731. doi: <https://doi.org/10.1093/brain/awh288>.
- 578 **Parisi V**, Manni G, Centofanti M, Gandolfi SA, Olzi D, Bucci MG. Correlation between optical coherence tomography, pattern electroretinogram, and visual evoked potentials in open-angle glaucoma patients. *Ophthalmol*. 2001; 108(5):905–912. doi: [https://doi.org/10.1016/s0161-6420\(00\)00644-8](https://doi.org/10.1016/s0161-6420(00)00644-8).
- 581 **de Pestere A**, Coon WG, Brunner P, Gunduz A, Ritaccio AL, Brunet NM, De Weerd P, Roberts MJ, Oostenveld R, Fries P, et al. Alpha power indexes task-related networks on large and small scales: A multimodal ECoG study in humans and a non-human primate. *NeuroImage*. 2016; 134:122–131. doi: <https://doi.org/10.1016/j.neuroimage.2016.03.074>.
- 585 **Pfurtscheller G**, Da Silva FL. Event-related EEG/MEG synchronization and desynchronization: basic principles. *Clin Neurophysiol*. 1999; 110(11):1842–1857. doi: [https://doi.org/10.1016/s1388-2457\(99\)00141-8](https://doi.org/10.1016/s1388-2457(99)00141-8).
- 587 **Picton TW**, Hillyard SA, Krausz HI, Galambos R. Human auditory evoked potentials. I: Evaluation of components. *Electroencephalogr Clin Neurophysiol*. 1974; 36:179–190. doi: [https://doi.org/10.1016/0013-4694\(74\)90155-2](https://doi.org/10.1016/0013-4694(74)90155-2).
- 590 **Plat F**, Praamstra P, Horstink M. Redundant-signals effects on reaction time, response force, and movement-related potentials in Parkinson's disease. *Exp Brain Res*. 2000; 130(4):533–539. doi: <https://doi.org/10.1007/s002219900276>.
- 593 **Polich J**, Lawson D. Event-related potential paradigms using tin electrodes. *Am J EEG Technol*. 1985; 25(3):187–192. doi: <https://doi.org/10.1080/00029238.1985.11080171>.
- 595 **Rahn E**, Basar E. Prestimulus EEG-activity strongly influences the auditory evoked vertex response: a new method for selective averaging. *Int J Neurosci*. 1993; 69(1-4):207–220. doi: <https://doi.org/10.3109/00207459309003331>.
- 598 **Ray S**, Maunsell JH. Different origins of gamma rhythm and high-gamma activity in macaque visual cortex. *PLoS Biol*. 2011; 9(4). doi: <https://doi.org/10.1371/journal.pbio.1000610>.
- 600 **Roth WT**, Horvath TB, Pfefferbaum A, Kopell BS. Event-related potentials in schizophrenics. *Electroencephalogr Clin Neurophysiol*. 1980; 48(2):127–139. doi: [https://doi.org/10.1016/0013-4694\(80\)90299-0](https://doi.org/10.1016/0013-4694(80)90299-0).
- 602 **de la Salle S**, Chouery J, Shah D, Bowers H, McIntosh J, Ilivitsky V, Knott V. Effects of ketamine on resting-state EEG activity and their relationship to perceptual/dissociative symptoms in healthy humans. *Front Pharmacol*. 2016; 7:348. doi: <https://doi.org/10.3389/fphar.2016.00348>.
- 605 **Sauseng P**, Klimesch W, Gruber W, Hanslmayr S, Freunberger R, Doppelmayr M. Are event-related potential components generated by phase resetting of brain oscillations? A critical discussion. *Neuroscience*. 2007; 146(4):1435–1444. doi: <https://doi.org/10.1016/j.neuroscience.2007.03.014>.
- 608 **Savers BM**, Beagley H, Henshall W. The mechanism of auditory evoked EEG responses. *Nature*. 1974; 247(5441):481. doi: <https://doi.org/10.1038/247481a0>.



- 610 **Schalk G**, McFarland DJ, Hinterberger T, Birbaumer N, Wolpaw JR. BCI2000: a general purpose  
611 brain-computer interface (BCI) system. *IEEE Trans Biomed Eng.* 2004; 51(6):1034–1043. doi:  
612 <https://doi.org/10.1109/TBME.2004.827072>.
- 613 **Schalk G**. A general framework for dynamic cortical function: the function-through-biased-oscillations (FBO)  
614 hypothesis. *Front Hum Neurosci.* 2015; 9:352. doi: <https://doi.org/10.3389/fnhum.2015.00352>.
- 615 **Schalk G**, Marple J, Knight RT, Coon WG. Instantaneous voltage as an alternative to power-and  
616 phase-based interpretation of oscillatory brain activity. *NeuroImage.* 2017; 157:545–554. doi:  
617 <https://doi.org/10.1016/j.neuroimage.2017.06.014>.
- 618 **Scherg M**, Vajsar J, Picton TW. A source analysis of the late human auditory evoked potentials. *J Cogn Neurosci.*  
619 1989; 1(4):336–355. doi: <https://doi.org/10.1162/jocn.1989.1.4.336>.
- 620 **Shah AS**, Bressler SL, Knuth KH, Ding M, Mehta AD, Ulbert I, Schroeder CE. Neural dynamics and the  
621 fundamental mechanisms of event-related brain potentials. *Cereb Cortex.* 2004; 14(5):476–483. doi:  
622 <https://doi.org/10.1093/cercor/bhh009>.
- 623 **Sharbrough F**. American Electroencephalographic Society guidelines for standard electrode position nomen-  
624 clature. *J Clin Neurophysiol.* 1991; 8:200–202.
- 625 **da Silva FHL**. Event-related neural activities: what about phase? *Prog Brain Res.* 2006; 159:3–17. doi:  
626 [https://doi.org/10.1016/S0079-6123\(06\)59001-6](https://doi.org/10.1016/S0079-6123(06)59001-6).
- 627 **Sur S**, Sinha V. Event-related potential: An overview. *Ind Psychiatry J.* 2009; 18(1):70. doi:  
628 <https://doi.org/10.4103/0972-6748.57865>.
- 629 **Takeda Y**, Yamanaka K, Yamamoto Y. Temporal decomposition of EEG during a simple reaction  
630 time task into stimulus-and response-locked components. *NeuroImage.* 2008; 39(2):742–754. doi:  
631 <https://doi.org/10.1016/j.neuroimage.2007.09.003>.
- 632 **Thatcher RW**. Coherence, phase differences, phase shift, and phase lock in EEG/ERP analyses. *Dev Neuropsychol.*  
633 2012; 37(6):476–496. doi: <https://doi.org/10.1080/87565641.2011.619241>.
- 634 **Tremblay K**, Ross B, Inoue K, McClannahan K, Collet G. Is the auditory evoked P2 response a biomarker of  
635 learning? *Front Syst Neurosci.* 2014; 8:28. doi: <https://doi.org/10.3389/fnsys.2014.00028>.
- 636 **Turi G**, Gotthardt S, Singer W, Munk M, Wibral M, et al. Quantifying additive evoked con-  
637 tributions to the event-related potential. *NeuroImage.* 2012; 59(3):2607–2624. doi:  
638 <https://doi.org/10.1016/j.neuroimage.2011.08.078>.
- 639 **Wechsler D**. Wais-III, Wechsler Adult Intelligence Scale. San Antonio, TX: Psychological Corporation; 1997.

640 **Appendix 1**

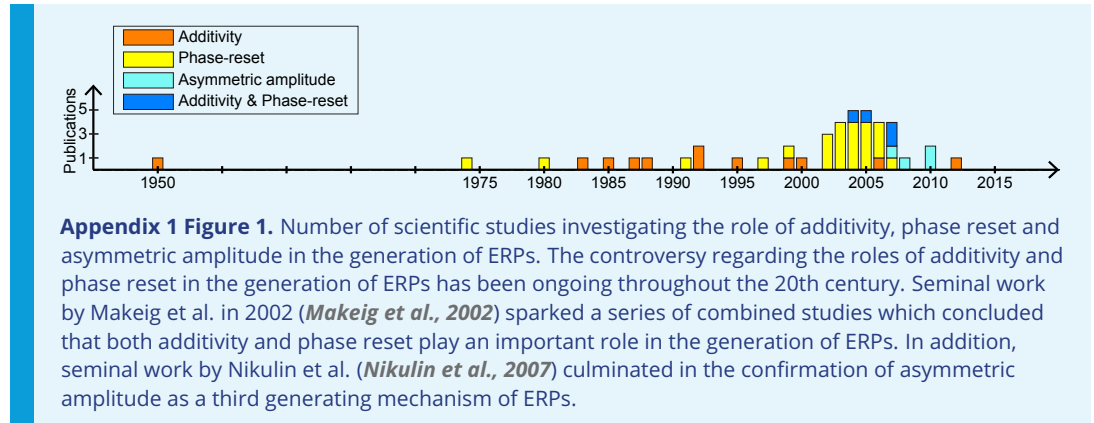

641 **Appendix 1 Figure 1.** Number of scientific studies investigating the role of additivity, phase reset and  
642 asymmetric amplitude in the generation of ERPs. The controversy regarding the roles of additivity and  
643 phase reset in the generation of ERPs has been ongoing throughout the 20th century. Seminal work  
644 by Makeig et al. in 2002 (*Makeig et al., 2002*) sparked a series of combined studies which concluded  
645 that both additivity and phase reset play an important role in the generation of ERPs. In addition,  
646 seminal work by Nikulin et al. (*Nikulin et al., 2007*) culminated in the confirmation of asymmetric  
647 amplitude as a third generating mechanism of ERPs.  
648

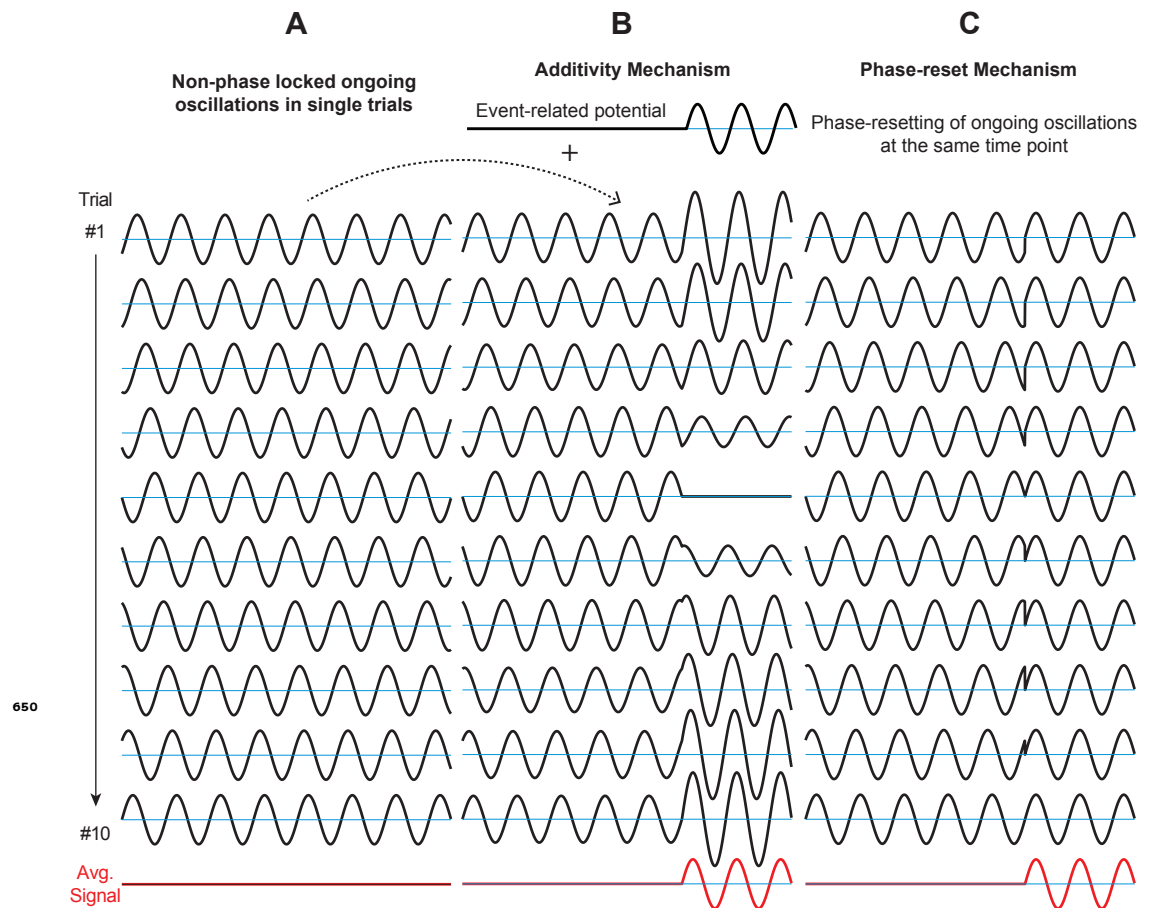

**Figure 1-Figure supplement 1.** Graphical explanation of the role of additivity and phase reset in generating event-related potentials (ERPs). The oscillations depicted in A-C are non-phase-locked across trials. **A.** Without any change to the amplitude or phase of the signals, the average across trials equals zero. **B.** In the additivity mechanism, in each trial, components exhibiting the same frequency characteristic as the ongoing oscillation are added to the ongoing oscillations. The average across trials reveals an ERP. The main characteristic of additivity is the independence between ongoing oscillation and evoked potential. Thus, ongoing oscillations are considered background noise that averages out to zero across trials, and only external stimuli directly affect ERPs. **C.** In the phase-reset mechanism, for each trial, the phase of the ongoing oscillation is reset at a certain time point after stimulus onset. The average across trials reveals an ERP. In contrast to additivity, the generation of an ERP is dependent on the phase of the ongoing oscillation. Thus, external stimuli can affect ERPs only indirectly through inducing a phase-reset in the ongoing oscillation. While the additivity and phase-reset mechanisms can both explain the generation of ERPs, their physiological pathways may be fundamentally different.

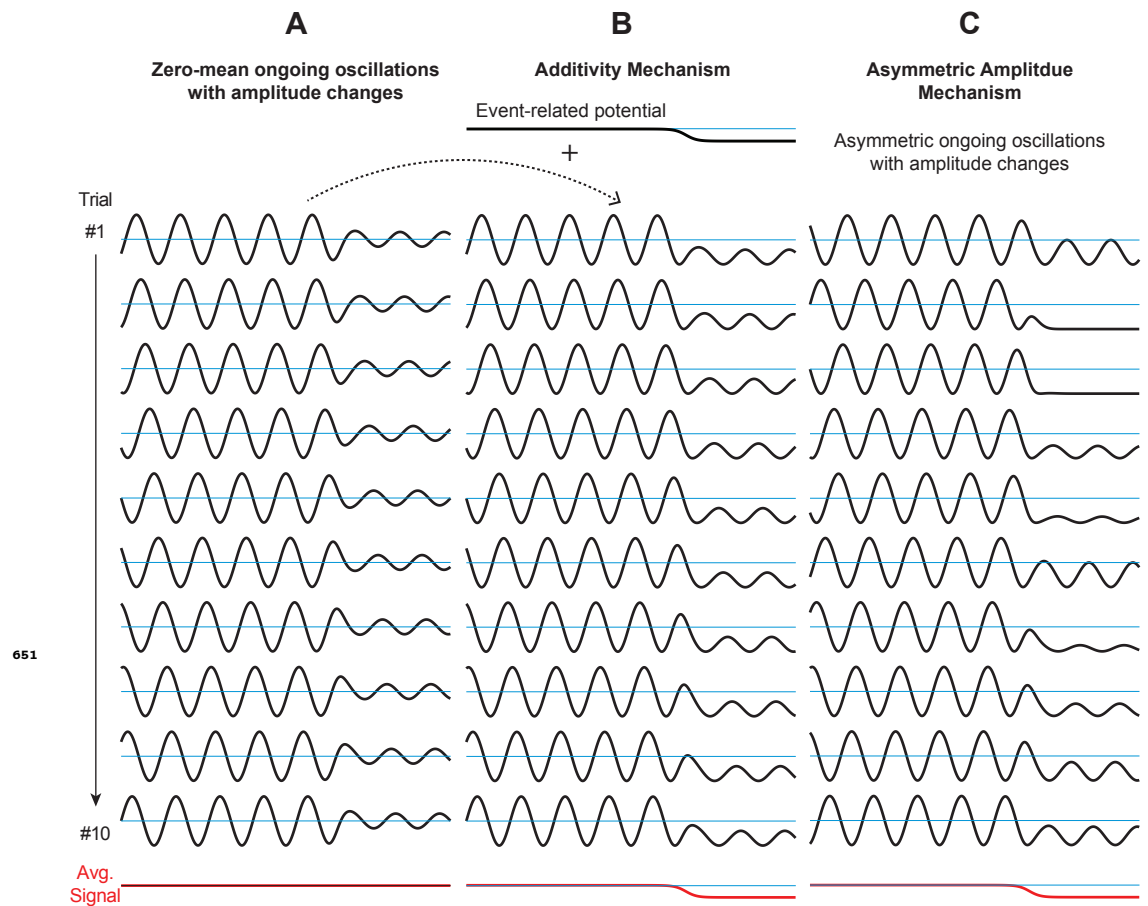

**Figure 1-Figure supplement 2.** Graphical explanation of the role of additivity and asymmetry in generating event-related potentials (ERPs). The oscillations depicted in A-C are non-phase-locked across trials. **A.** Without any change to the bias of the signals, the average across trials equals zero. **B.** In the additivity mechanism, in each trial, an ERP is added to the ongoing oscillation. The average across trials reveals the ERP, while individual trials appear to exhibit asymmetry. **C.** In the asymmetric amplitude mechanism, for each trial, the ongoing oscillation exhibits asymmetry during or after the amplitude changes. The average across trials reveals the ERP. In contrast to additivity, the generation of an ERP is dependent on the amplitude envelope of the ongoing oscillation. Thus, external stimuli can affect ERPs only indirectly through affecting the amplitude and asymmetry in the ongoing oscillation. While the additivity and asymmetric amplitude mechanisms can both explain the generation of ERPs, their physiological pathways may be fundamentally different.

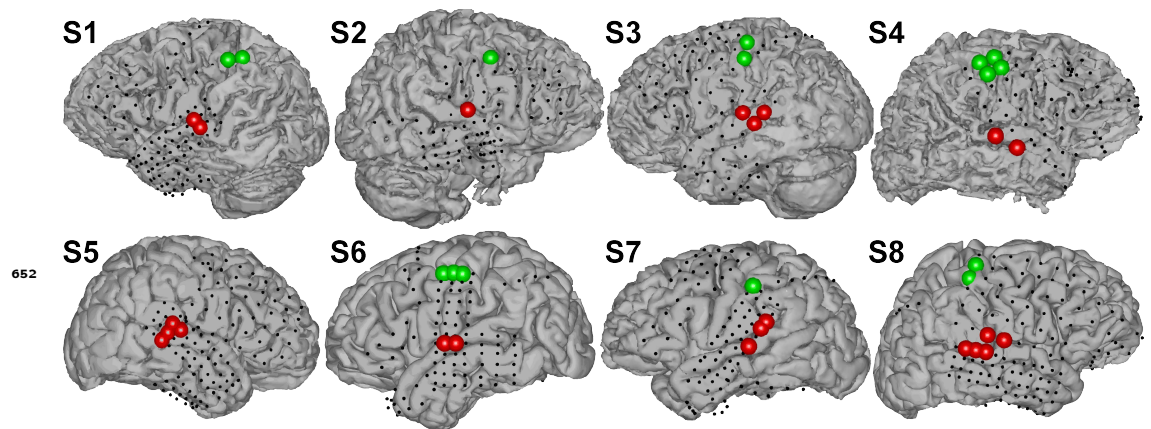

**Figure 2-Figure supplement 1.** Cortical locations with activation in the high gamma band (70–170 Hz) during auditory (red) and motor task (green). Auditory tasks activated areas in STG, while motor tasks activated areas in M1 motor cortex.

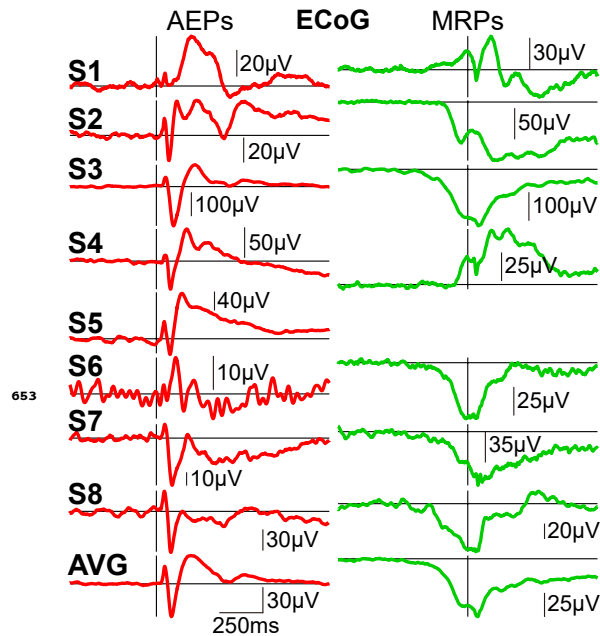

**Figure 2-Figure supplement 2.** AEPs (left) and MRPs (right) from ECoG responses in subjects S1–S8. AEPs show typical N1, P1, and P2 components in 6/8 subjects. MRPs show a typical slow negative potential at movement onset in 5/7 subjects. The amplitudes of these potentials vary across subjects.

### Auditory Evoked Potential (AEP)

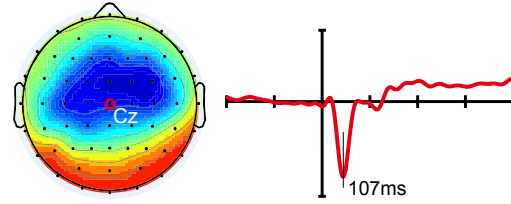

### Movement-related Potential (MRP)

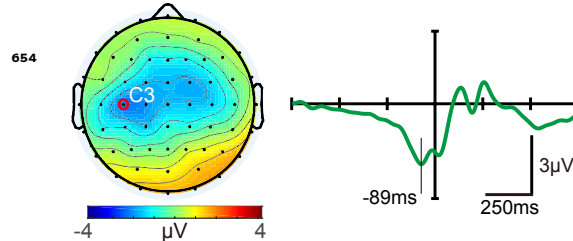

**Figure 2-Figure supplement 3.** Topography and shape of grand average AEP (top) and MRP (bottom) obtained from EEG across seven subjects in this study. Topographies (left) depict the voltage distribution at the peak of the AEP (107 ms) and MRP (-89 ms), respectively. AEP and MRP plots are centered at stimulus onset and button press, respectively.

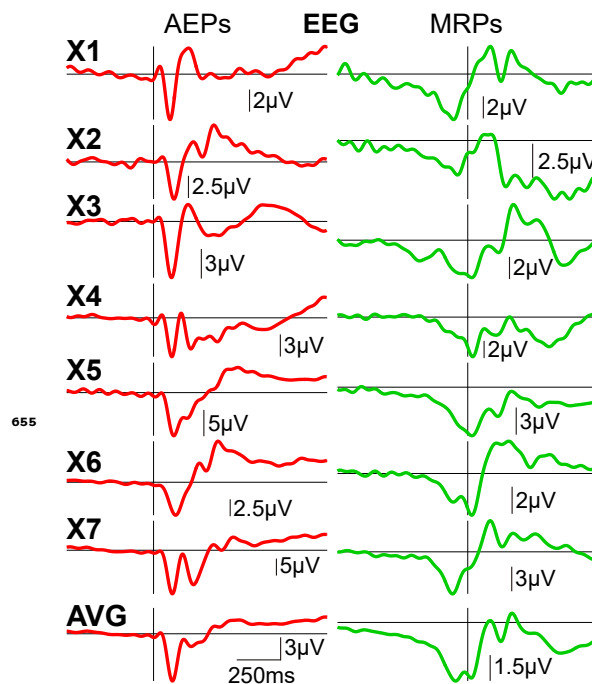

**Figure 2-Figure supplement 4.** AEPs at Cz (left) and MRPs at C3 (right) from EEG responses in subjects X1-X7. AEPs show typical N1, P1, and P2 components in all subjects. MRPs show a typical slow negative potential at movement onset in all subjects. There is very little variance in the amplitude of these responses across subjects.

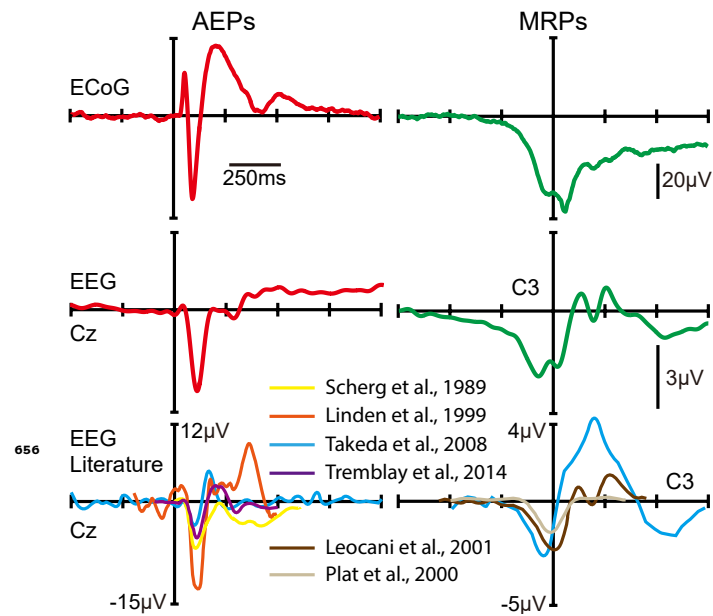

**Figure 2-Figure supplement 5.** Grand average ERPs obtained from ECoG and EEG in this study (top and center) and grand average ERPs from the EEG literature (bottom). The shape of ERPs obtained from ECoG is in general agreement with ERPs obtained from EEG and with the description of ERPs in the EEG literature (*Scherg et al., 1989; Linden et al., 1999; Takeda et al., 2008; Tremblay et al., 2014; Leocani et al., 2001; Plat et al., 2000*). Specifically, AEPs obtained from ECoG demonstrate the same N1, P1, and P2 components, as previously described in the EEG literature. Similarly, MRPs obtained from ECoG demonstrate the same slow negative potential around movement onset time.

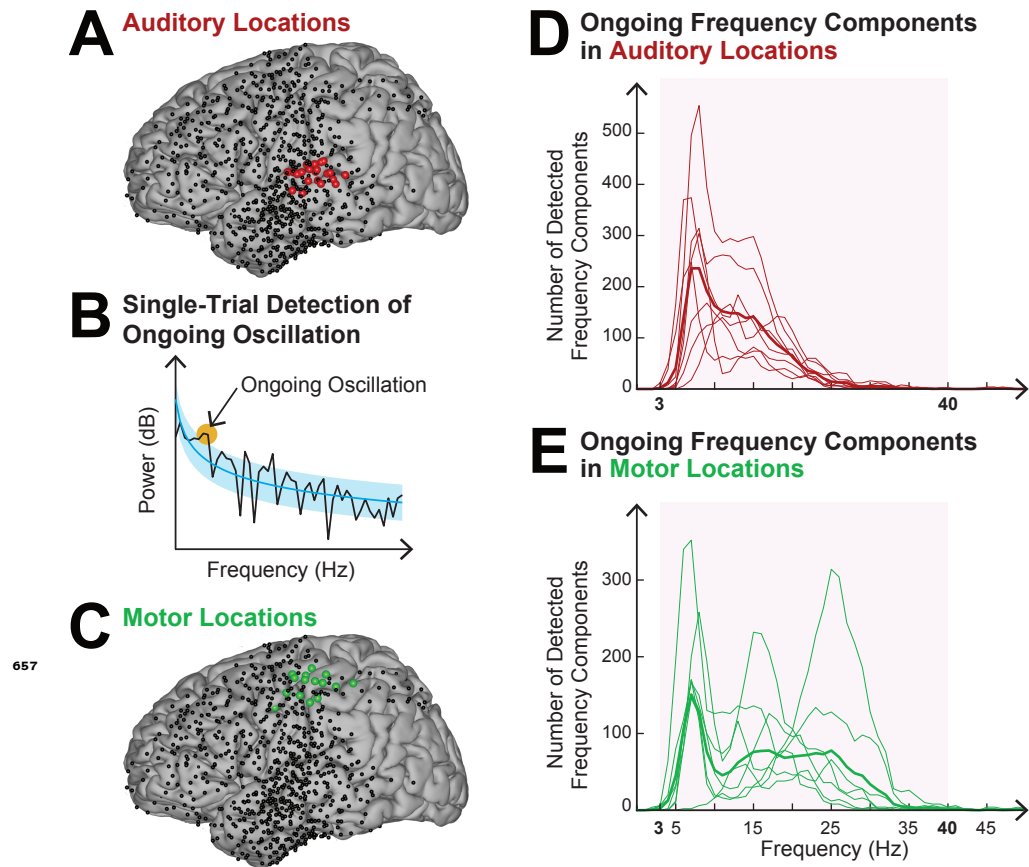

**Figure 3-Figure supplement 1.** Determining the frequency band of the ongoing oscillation for auditory and motor across all eight subjects and all trials. **A.** Electrode locations for all subjects (black dots). Locations that exhibited task-related activity during auditory stimulation are highlighted in red. **B.** Detecting frequency of ongoing oscillations. Ongoing oscillations are detected as those clusters of points (orange) in the power spectrum (black) that exceed one  $\sigma$  (blue-shaded) of the estimated  $1/f$  power-law spectrum (blue, applied in single trials to the 1000 ms-long pre-stimulus period, see *Donoghue et al. 2020*; *Buzsáki et al. 2013*; *Nunez and Srinivasan 1981* for details). **C.** Locations that exhibited task-related activity during motor movements are highlighted in green. **D. & E.** Histograms of detected ongoing oscillation frequencies for auditory (D, red) and motor (E, green) locations. Thin lines represent individual subjects, and thick lines the average across subjects. The red shaded area depicts the frequency of the ongoing oscillation. Within this band, most ongoing oscillations occur at 7 Hz. Motor locations exhibit ongoing oscillations in the beta band. This analysis determined the frequency band of ongoing oscillation as 3–40 Hz.



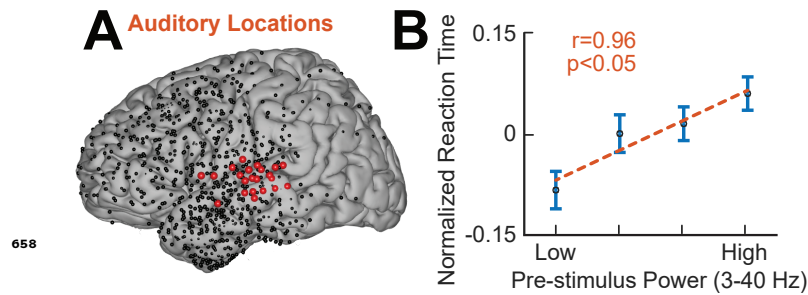

**Figure 3-Figure supplement 2.** Relationship between ongoing oscillatory power and reaction time. **A.** Electrode locations for all subjects (black dots). Locations exhibiting a high gamma response (70–170 Hz) within auditory cortex are depicted in red. **B.** Increased pre-stimulus (-250–0 ms) oscillatory power (3–40 Hz) increases reaction time ( $r=0.96$ ,  $p<0.05$ , Pearson's correlation, binned pre-stimulus 3–40 Hz power, across all trials and all subjects).

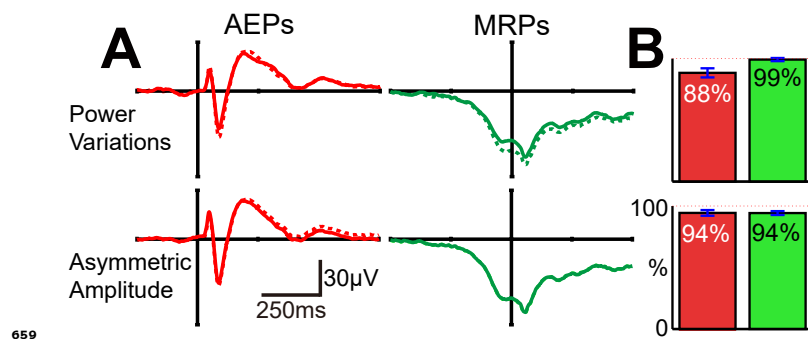

**Figure 5-Figure supplement 1.** Effect of power variations and asymmetric amplitude of the ongoing oscillation on the shape and energy of ERPs. **A.** Shape of AEPs and MRPs before (dashed lines) and after (solid lines) removing power variations and asymmetric amplitude from the ongoing oscillation. Neither AEPs nor MRPs are markedly affected in their shape by this removal. **B.** Energy remaining in the resulting AEPs and MRPs after removing power variations and asymmetric amplitude from the ongoing oscillation. Neither AEPs nor MRPs are significantly affected in their energy by this removal. Removing the contribution of power variations reduces the energy of the resulting AEPs, while the energy of MRPs remains unaffected. In contrast, removing the contribution of asymmetric amplitude minimally and equally reduces the energy of AEPs and MRPs.

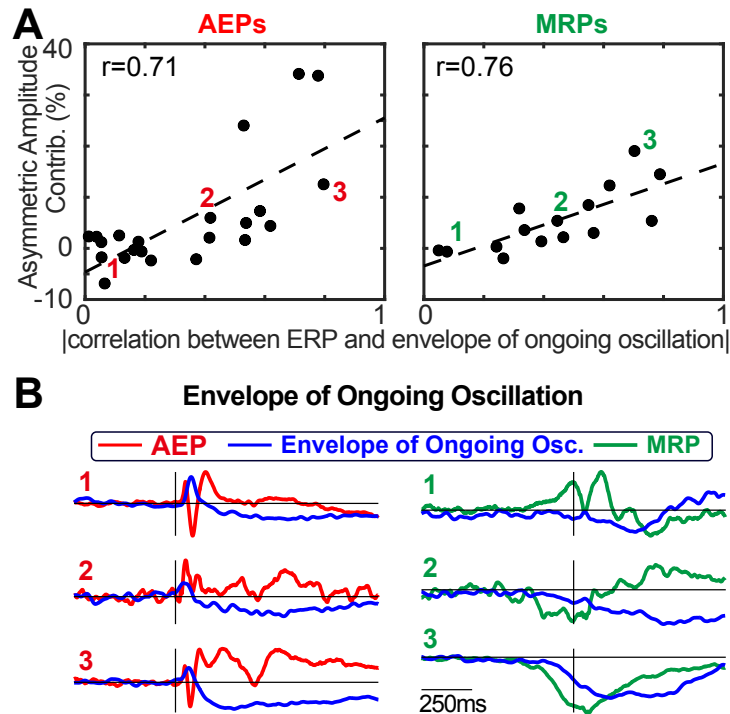

**Figure 5-Figure supplement 2.** Asymmetric amplitude contribution to the energy of ERPs. **A.** The contribution of asymmetric amplitude to the energy of ERPs is driven by the ERP's correlation with the envelope of the ongoing oscillation (AEPs:  $p < 0.01$ ,  $r = 0.71$ ; MRPs:  $p < 0.01$ ,  $r = 0.76$ ; Pearson's correlation). **B.** Three examples for low, medium, and high correlations between ERP and the envelope of the ongoing oscillation.
